# Supplementary material for: The MTH1 inhibitor TH588 is a microtubule-modulating agent that eliminates cancer cells by activating the mitotic surveillance pathway
Source: Sci Rep. 2019 Oct 11;9:14667. doi: 10.1038/s41598-019-51205-w (PMC6789014; doi:10.1038/s41598-019-51205-w)
Supplement: Supplementary file 8 — Data file S1 [file 41598_2019_51205_MOESM8_ESM.xlsx]

## Sheet: Cell cycle library
Gene rankings based on MAGeCK MLE gene scores
Gene	Beta score	P-value	FDR
TP53	3.5414	1.2208e-05	0.012
USP28	2.2184	8.5453e-05	0.0176
TPX2	1.7551	0.00046389	0.041455
USP8	1.5302	0.001296	0.079625
YEATS4	1.4327	0.0021139	0.095182
CAB39	1.3709	0.0028423	0.10832
CGREF1	1.2317	0.0055565	0.11621
NUMA1	1.2207	0.00588	0.1173
FZR1	1.215	0.0060387	0.1173
SSNA1	1.2099	0.0062299	0.1173
RACGAP1	1.0823	0.011772	0.14918
NUP107	1.0764	0.012092	0.15046
MAPRE1	1.0553	0.01342	0.15722
KPNA2	1.0224	0.015715	0.16976
SPDYC	1.0202	0.0159	0.16989
MCM6	1.0055	0.017186	0.17972
ARHGEF10	0.98713	0.018881	0.19014
KIF23	0.97966	0.019707	0.19014
CINP	0.97537	0.02012	0.19014
CENPF	0.9637	0.021365	0.19014
MSH4	0.96129	0.021664	0.19014
RIF1	0.96122	0.02167	0.19014
RAB1A	0.95938	0.021858	0.19014
SEPT11	0.94709	0.023266	0.19443
BIRC5	0.94381	0.023672	0.19443
TERF2	0.9398	0.024208	0.19623
CUL2	0.92774	0.025849	0.20211
NAE1	0.92232	0.026586	0.20578
KIF2A	0.91609	0.027428	0.20986
CDKN1A	0.90519	0.028956	0.21417
TCF7L2	0.89241	0.031072	0.2222
MEI1	0.88957	0.031538	0.22304
KIAA1009	0.88551	0.032171	0.22428
CECR2	0.88241	0.032651	0.22603
FANCI	0.86775	0.035135	0.22892
PARD6A	0.86747	0.035186	0.22892
DMTF1	0.86134	0.03633	0.22892
UTP14C	0.85176	0.038258	0.23163
PSMA8	0.84183	0.040258	0.23436
CDCA8	0.83998	0.040604	0.23479
HORMAD1	0.83105	0.042578	0.24264
PRDM5	0.81813	0.045626	0.24418
USP37	0.81577	0.046189	0.24418
DIAPH2	0.81428	0.04656	0.24418
MCM10	0.81399	0.046625	0.24418
HSPA2	0.81039	0.047587	0.24418
CHD3	0.80831	0.048079	0.24419
KIAA2022	0.80786	0.048191	0.24419
MYH9	0.80287	0.049381	0.24765
PSMC4	0.79978	0.050197	0.24921
GINS4	0.79599	0.051241	0.25019
BRE	0.79251	0.052197	0.25152
GPS2	0.7832	0.054844	0.25919
SKIL	0.78117	0.055477	0.26021
DYNC1LI1	0.77978	0.0559	0.26021
SUV39H1	0.77034	0.058804	0.26886
PPP1R12A	0.76078	0.061766	0.27724
CCNB3	0.74855	0.065858	0.28777
DCTN3	0.74332	0.06775	0.28777
PPP6C	0.72494	0.074678	0.29841
MCM5	0.72119	0.076096	0.29961
MAD1L1	0.72107	0.076136	0.29961
RPA4	0.71986	0.076602	0.29961
PSMD4	0.71823	0.077276	0.29961
MDK	0.71664	0.077969	0.30056
HEPACAM	0.71591	0.078277	0.30057
TUBGCP6	0.7115	0.080146	0.30536
CDK2AP1	0.71012	0.080726	0.30639
POLD2	0.70754	0.081831	0.30892
ORC3	0.7064	0.082293	0.30892
GNAI1	0.70298	0.083807	0.31203
KDM8	0.69434	0.087617	0.32018
PRKAR1A	0.69269	0.088458	0.32205
ING1	0.69053	0.089365	0.32415
E2F8	0.68543	0.091727	0.32907
MAD2L1	0.68333	0.092793	0.32907
IL8	0.68221	0.093379	0.32907
GSPT2	0.68217	0.093398	0.32907
GAS6	0.67892	0.094983	0.33004
DHCR24	0.67716	0.095878	0.33149
RAD54B	0.6763	0.096334	0.33149
INTS7	0.67215	0.098421	0.33149
C15orf60	0.67186	0.098541	0.33149
SPO11	0.66967	0.099679	0.33149
CYP26B1	0.6682	0.10046	0.33149
MEN1	0.6681	0.10052	0.33149
GIGYF2	0.66795	0.1006	0.33149
SPTBN1	0.66755	0.10083	0.33149
CDC14A	0.66621	0.10161	0.33293
FOXO4	0.66254	0.1036	0.33484
NCAPG	0.66222	0.10377	0.33484
CDK5R1	0.66023	0.10487	0.33484
BRCA1	0.65807	0.10605	0.33484
41526	0.65548	0.10748	0.33484
GADD45A	0.65532	0.10758	0.33484
HTRA2	0.65377	0.10846	0.33484
CENPL	0.6537	0.1085	0.33484
SMARCAD1	0.65361	0.10857	0.33484
PNPT1	0.65272	0.10907	0.33484
PMS1	0.65191	0.10954	0.33484
TIMELESS	0.64957	0.1109	0.33484
PPP1R12B	0.64881	0.11132	0.33484
HCFC1	0.64679	0.1125	0.33484
MAEL	0.64651	0.11264	0.33484
SEC13	0.64587	0.11302	0.33484
TADA3	0.6457	0.11314	0.33484
CNTRL	0.64473	0.11361	0.33484
HDAC8	0.64217	0.11523	0.33812
PMS2	0.64054	0.11619	0.33929
ERCC2	0.64021	0.11641	0.33929
CDC6	0.63874	0.11739	0.33998
CETN3	0.63845	0.11759	0.33998
MAU2	0.63383	0.12054	0.34633
PPM1A	0.63243	0.12143	0.34633
MCM7	0.62891	0.12362	0.34633
MIS12	0.62549	0.12578	0.34899
TBRG4	0.62469	0.12628	0.34899
HMGA2	0.62039	0.12919	0.3515
PIN1	0.62005	0.12944	0.3515
SMAD3	0.61747	0.13106	0.35326
MIS18A	0.61719	0.13127	0.35326
NEDD9	0.61643	0.13174	0.35326
PSMD2	0.61621	0.13189	0.35326
RFC4	0.60944	0.13639	0.35945
BCCIP	0.60439	0.14008	0.36554
PBRM1	0.60338	0.14085	0.36554
C10orf90	0.60085	0.14263	0.36702
MBD4	0.6	0.14323	0.36757
GMNC	0.59895	0.14396	0.36757
SYCE2	0.59723	0.14528	0.36868
MCTS1	0.59696	0.1455	0.36868
YWHAG	0.59694	0.14552	0.36868
TTYH1	0.59478	0.14714	0.37025
RINT1	0.5946	0.14727	0.37025
RCC2	0.59197	0.14927	0.37283
POLA2	0.59178	0.14944	0.37283
SPC25	0.58972	0.15099	0.37576
TUBA4A	0.58833	0.15197	0.37629
PAPD7	0.58118	0.15769	0.38307
MFN2	0.58059	0.15822	0.38307
UBA3	0.57714	0.16105	0.38798
DICER1	0.5762	0.16183	0.38798
PPP3CA	0.57531	0.16261	0.38798
FGFR1OP	0.57375	0.16387	0.39003
TUBGCP3	0.57222	0.16523	0.3914
MPHOSPH8	0.57168	0.16569	0.3914
MAGI2	0.56906	0.16775	0.39396
KNTC1	0.5678	0.16885	0.39519
CHMP3	0.56677	0.1697	0.39623
BOD1	0.5641	0.172	0.40053
PDS5B	0.56369	0.17236	0.40053
RANBP2	0.56282	0.17304	0.40118
GTPBP8	0.56168	0.17407	0.40157
DBC1	0.56051	0.17511	0.40157
SART1	0.55921	0.17627	0.40157
PSME1	0.5572	0.17809	0.40157
MLF1IP	0.55451	0.18051	0.40216
B9D2	0.55416	0.18079	0.40216
RAD51D	0.55329	0.18157	0.40216
RBL1	0.55327	0.1816	0.40216
SPDYA	0.55321	0.18165	0.40216
HAUS2	0.5511	0.18361	0.40412
PSMC3IP	0.55085	0.18388	0.40412
ANAPC2	0.5469	0.18754	0.41059
KHDRBS1	0.54553	0.18882	0.41154
PRC1	0.54433	0.19002	0.41326
CUL3	0.54275	0.19158	0.41442
GML	0.5406	0.19352	0.41582
PSMD3	0.54038	0.19374	0.41582
SYCP1	0.53772	0.19604	0.4188
BUB3	0.53667	0.19713	0.41919
PPAT	0.53273	0.20081	0.42199
NSL1	0.53204	0.20149	0.42199
SYCE3	0.53157	0.20197	0.42199
STAMBP	0.53047	0.20307	0.42222
CTDP1	0.52923	0.20437	0.42383
HUS1B	0.52728	0.20626	0.42514
CENPV	0.52509	0.20839	0.42579
PSMB5	0.52472	0.2087	0.42579
CDC20	0.52448	0.20893	0.42579
RPA1	0.52405	0.20937	0.42579
SPG20	0.52341	0.20998	0.42579
MSH6	0.52329	0.21008	0.42579
SLC26A8	0.52256	0.21078	0.42618
PSME4	0.52218	0.21114	0.42618
CCNDBP1	0.5214	0.21185	0.42675
TOP2B	0.5183	0.215	0.43044
OSGIN2	0.516	0.21731	0.4333
CDKN1B	0.51475	0.21861	0.4343
FBXO6	0.51389	0.21956	0.4343
SMC3	0.51368	0.21978	0.4343
HSP90AA1	0.51265	0.22088	0.4343
SGOL2	0.51236	0.2212	0.4343
PSMB10	0.51161	0.22199	0.4343
CDC45	0.51046	0.22313	0.4343
LEPREL4	0.5103	0.22331	0.4343
CEP63	0.51009	0.22349	0.4343
EMD	0.51002	0.22356	0.4343
NUP37	0.50938	0.22425	0.4343
AVPI1	0.50823	0.22543	0.4343
ORC1	0.50755	0.22611	0.4343
PIWIL2	0.50734	0.22635	0.4343
EIF4G3	0.50692	0.22682	0.4343
JAG2	0.50671	0.22709	0.4343
TPD52L1	0.50532	0.22859	0.43547
KNSTRN	0.50403	0.22994	0.43665
RAD54L	0.50382	0.23018	0.43665
41517	0.50209	0.23206	0.43665
41522	0.50124	0.23299	0.43665
KHDC3L	0.49995	0.23444	0.43665
HTT	0.49992	0.23445	0.43665
PRNP	0.49764	0.23699	0.43992
SPIRE1	0.49719	0.23748	0.43992
RAD1	0.49623	0.23853	0.43992
BCL2	0.49518	0.23968	0.4412
NABP1	0.4941	0.24095	0.4417
C11orf82	0.49385	0.24125	0.4417
CDKN2C	0.49359	0.24161	0.4417
DST	0.49212	0.24335	0.4417
RCC1	0.49177	0.24373	0.4417
CEP76	0.49161	0.24391	0.4417
MRPL41	0.49154	0.24399	0.4417
RAN	0.49104	0.24457	0.44193
HSF1	0.48427	0.25251	0.45213
NUP133	0.48247	0.2547	0.45358
USO1	0.47756	0.26076	0.46101
PSMD6	0.47579	0.263	0.46296
UHRF1	0.47558	0.26327	0.46296
TDRD9	0.47001	0.27027	0.46929
DLG1	0.4699	0.27042	0.46929
NCAPD3	0.46969	0.27067	0.46929
LLGL2	0.46602	0.27548	0.4752
PRIM1	0.46595	0.27555	0.4752
KIF18A	0.46461	0.27731	0.47656
PAPD5	0.46384	0.27836	0.47753
SMC5	0.45984	0.28373	0.48505
SMARCB1	0.4548	0.29043	0.49138
HDAC1	0.45418	0.29129	0.49199
CHFR	0.45146	0.29486	0.49468
LIG1	0.45023	0.29645	0.49565
MSH5	0.45009	0.29666	0.49565
BRD7	0.44868	0.2985	0.49663
MAEA	0.44855	0.29867	0.49663
SPIN1	0.44823	0.29909	0.49663
ING2	0.44673	0.30114	0.4983
CACUL1	0.44588	0.30226	0.4983
WNT9A	0.44544	0.30286	0.4983
TGFB1	0.44518	0.30318	0.4983
BACH1	0.44484	0.30364	0.4983
CEP250	0.44232	0.3071	0.50146
SF1	0.44095	0.30909	0.50303
ALMS1	0.43979	0.31068	0.50395
DNAJC2	0.43793	0.31332	0.50741
CTCFL	0.43642	0.31552	0.50929
CLTCL1	0.43436	0.31854	0.51259
SKA1	0.43431	0.31861	0.51259
KIF22	0.43323	0.32022	0.51344
CNTROB	0.4329	0.3207	0.51344
HELLS	0.43141	0.32284	0.51363
HHEX	0.42966	0.32544	0.51682
CDT1	0.42679	0.32954	0.51867
CALR	0.4267	0.32969	0.51867
CENPA	0.42665	0.32978	0.51867
TADA2A	0.42626	0.33034	0.51873
DUSP13	0.42507	0.3321	0.52065
NCAPD2	0.42307	0.33502	0.52274
ORC2	0.42052	0.33878	0.52653
RAD50	0.41956	0.34031	0.52653
BLM	0.41934	0.34064	0.52653
KLHL21	0.41881	0.34143	0.52653
RAB2A	0.41867	0.34166	0.52653
LRWD1	0.41862	0.34174	0.52653
ANAPC11	0.41735	0.34364	0.52664
PCNT	0.41601	0.3456	0.52664
TEX15	0.41593	0.34573	0.52664
MCM2	0.41579	0.34596	0.52664
RFWD2	0.4157	0.34609	0.52664
GAS7	0.41234	0.35116	0.53019
CDC14B	0.4123	0.35124	0.53019
NPAT	0.41159	0.35243	0.53019
TUBB1	0.41035	0.35426	0.53019
CLOCK	0.4103	0.35433	0.53019
E2F2	0.4102	0.35448	0.53019
TSPYL2	0.40962	0.35544	0.53019
CLASP2	0.40532	0.36189	0.53737
WAC	0.4048	0.36261	0.53763
KIF2C	0.40381	0.36414	0.53879
KIF18B	0.40323	0.36504	0.53879
HDAC3	0.40288	0.36564	0.53887
KIF15	0.40043	0.36937	0.54174
PSMB6	0.39918	0.37128	0.5423
41524	0.39848	0.37238	0.5431
GFI1B	0.39693	0.3749	0.54401
CDC16	0.39675	0.37521	0.54401
BTRC	0.3963	0.37598	0.54432
VPS4B	0.39425	0.37946	0.54618
CD2AP	0.39416	0.37962	0.54618
ARAP1	0.39366	0.38045	0.54618
GSPT1	0.39355	0.38061	0.54618
CCNB2	0.3919	0.38336	0.54934
ANAPC13	0.39036	0.38588	0.54973
BIN3	0.3898	0.38676	0.54973
ERH	0.38966	0.387	0.54973
MCM8	0.38964	0.38703	0.54973
AUNIP	0.38959	0.38712	0.54973
KATNA1	0.38881	0.38843	0.55019
WBP2NL	0.3862	0.39264	0.55535
CHTF18	0.38542	0.39392	0.55632
FBXO43	0.38508	0.39446	0.55632
GMNN	0.38459	0.39526	0.55664
PIK3C3	0.38372	0.39675	0.55795
CDC27	0.38317	0.39769	0.55847
CEP70	0.38206	0.3996	0.55963
CFL1	0.38175	0.4001	0.55963
SYCE1	0.38091	0.40159	0.55963
PRIM2	0.38056	0.40215	0.55963
ANAPC7	0.37953	0.40399	0.56091
TUBGCP5	0.37812	0.4064	0.56245
TSC2	0.37788	0.40682	0.56245
RHOU	0.37662	0.40899	0.56387
RNF212	0.37611	0.40988	0.56388
IL12A	0.37596	0.41014	0.56388
KLHL22	0.3755	0.41091	0.56415
41530	0.3742	0.41317	0.56559
PPP2R2A	0.37405	0.41341	0.56559
NUP43	0.37388	0.41371	0.56559
SIRT7	0.37322	0.41484	0.56559
FSD1	0.37199	0.41703	0.56778
FBXL15	0.37043	0.41972	0.56938
TRIM21	0.3703	0.41994	0.56938
KIFC1	0.36965	0.42117	0.57026
ID2	0.36928	0.42183	0.57036
MYH10	0.36782	0.42449	0.57139
MPLKIP	0.36779	0.42453	0.57139
PHF13	0.36778	0.42456	0.57139
CENPJ	0.3662	0.4274	0.57139
STARD9	0.36603	0.42764	0.57139
ANAPC4	0.36591	0.42783	0.57139
TACC2	0.36573	0.42816	0.57139
SFI1	0.3656	0.42842	0.57139
INSC	0.36474	0.43	0.57139
RASSF4	0.36465	0.43014	0.57139
NSMCE2	0.36192	0.43491	0.57539
RHOB	0.36056	0.43736	0.57711
DDX11	0.36048	0.43751	0.57711
PPP1R1C	0.3602	0.43797	0.57711
USP22	0.35915	0.43977	0.57794
KIF20A	0.35802	0.44178	0.57979
NSUN2	0.35693	0.44377	0.58164
SPAST	0.35476	0.4478	0.58614
PMF1	0.35427	0.44869	0.58652
ZW10	0.35274	0.45157	0.58872
ESCO2	0.35215	0.45264	0.58934
PDS5A	0.35112	0.45457	0.59028
KLF11	0.34792	0.46038	0.59547
CEP120	0.34737	0.46145	0.59606
PSMB8	0.34429	0.46703	0.60012
TCF3	0.34385	0.46769	0.60018
SLC2A8	0.34321	0.46889	0.60052
ERCC3	0.34093	0.47307	0.60317
CDC23	0.34092	0.47309	0.60317
BEX2	0.34037	0.47408	0.60344
STRA13	0.33899	0.47666	0.60537
HAUS7	0.33839	0.47781	0.60553
CDC34	0.33793	0.47871	0.60555
CKAP2	0.33763	0.47927	0.60555
PSMC2	0.33596	0.48254	0.60812
PSMD9	0.3356	0.48322	0.6082
SOX11	0.33413	0.48604	0.61097
CCDC87	0.33333	0.48764	0.61142
PRKAR2B	0.33155	0.49101	0.61486
RGS2	0.33055	0.49286	0.61639
FOXM1	0.32941	0.49507	0.61736
LFNG	0.32917	0.49552	0.61736
PPP2R2D	0.32866	0.49646	0.61775
SPICE1	0.32766	0.49837	0.61934
ZNF830	0.32588	0.50173	0.62076
MAP9	0.32563	0.50228	0.62076
ATRIP	0.32516	0.50319	0.62076
RAB11B	0.32515	0.5032	0.62076
FBXL7	0.32507	0.5033	0.62076
SENP5	0.32423	0.50489	0.62194
PPP1R15A	0.32271	0.50803	0.62396
TRNP1	0.31975	0.5141	0.62856
POLA1	0.31886	0.51591	0.62999
PIWIL3	0.31676	0.51995	0.63413
OVOL1	0.31379	0.52575	0.64041
CDKN2D	0.31226	0.52873	0.64264
ZFYVE26	0.31107	0.53108	0.64451
CENPQ	0.30963	0.53392	0.64507
WTAP	0.30929	0.53458	0.64507
CDKN2A	0.30929	0.53458	0.64507
CDKN3	0.30925	0.53466	0.64507
NABP2	0.30882	0.53555	0.64507
GAS2L1	0.3085	0.53614	0.64507
EML4	0.30713	0.53917	0.64792
GFI1	0.30616	0.54111	0.649
NUDC	0.30596	0.54148	0.649
MPHOSPH6	0.30536	0.54271	0.649
PYHIN1	0.30427	0.54483	0.65075
CREBL2	0.30355	0.54632	0.65174
CKAP5	0.3028	0.5479	0.65262
TUBG1	0.30228	0.54905	0.65262
EZH2	0.30117	0.55149	0.65394
AJUBA	0.30078	0.55234	0.65415
CLIP1	0.3004	0.55314	0.65431
RFC1	0.29926	0.55554	0.6562
IFNG	0.299	0.55607	0.6562
SYCP3	0.29802	0.55797	0.65687
MEIOB	0.29455	0.56506	0.66363
PRKAG1	0.29455	0.56506	0.66363
CGRRF1	0.29243	0.56946	0.668
HJURP	0.29086	0.57282	0.67113
ANXA11	0.28912	0.57649	0.67437
ARHGEF2	0.28843	0.57789	0.67466
RAD51B	0.28723	0.58042	0.67681
HORMAD2	0.28616	0.58269	0.67836
FAM175A	0.28547	0.58418	0.67836
RASSF1	0.28529	0.58451	0.67836
CENPE	0.28377	0.58764	0.68119
RPRM	0.28183	0.59192	0.68466
DCLRE1A	0.28149	0.59262	0.68466
NUSAP1	0.28146	0.59272	0.68466
PKD2	0.28023	0.5953	0.68684
ARL3	0.27846	0.59914	0.69045
HGF	0.27687	0.60254	0.69302
BAG6	0.27675	0.60278	0.69302
RSPH1	0.2755	0.60551	0.69535
MYBL2	0.2751	0.60638	0.69554
NINL	0.27372	0.60937	0.69749
CAB39L	0.27365	0.60951	0.69749
MLL5	0.2731	0.61068	0.69802
RGS14	0.27185	0.61335	0.70026
RB1CC1	0.26813	0.62157	0.70882
PLCB1	0.26708	0.62368	0.70989
CROCC	0.2667	0.62447	0.70989
BCAT1	0.26638	0.62514	0.70989
AKAP8	0.26626	0.6254	0.70989
GPS1	0.26496	0.62825	0.71203
TUSC2	0.26472	0.62873	0.71203
FBXW11	0.26273	0.63309	0.71614
SLBP	0.26192	0.63488	0.71646
STEAP3	0.26182	0.6351	0.71646
RAB11FIP4	0.2616	0.63555	0.71646
USP2	0.25874	0.64193	0.72199
PSMB3	0.25832	0.64284	0.72218
DHH	0.25756	0.6445	0.72322
RFC5	0.25529	0.64929	0.72715
FAM83D	0.25519	0.64948	0.72715
ANAPC16	0.25405	0.65204	0.7284
GAS2	0.25403	0.65208	0.7284
APP	0.25059	0.65967	0.73604
HEPACAM2	0.24995	0.6612	0.73639
PKD1	0.2493	0.66267	0.73639
CCNK	0.2492	0.66295	0.73639
PIDD	0.24919	0.66298	0.73639
PSMD14	0.24841	0.66478	0.73703
TFDP2	0.24829	0.66505	0.73703
RAB35	0.24757	0.66663	0.73795
CDKN1C	0.24475	0.67287	0.74304
HAUS5	0.24471	0.67299	0.74304
BCL2L1	0.24449	0.6735	0.74304
MNS1	0.24407	0.67449	0.7433
BLZF1	0.24309	0.67668	0.74488
CEP57	0.24185	0.67937	0.74613
FBXW5	0.24156	0.68004	0.74613
CDC123	0.24154	0.68009	0.74613
DMC1	0.23904	0.68569	0.75103
TP73	0.23887	0.68609	0.75103
TDRD1	0.23769	0.6886	0.7521
SOX4	0.2352	0.69421	0.75739
MND1	0.23475	0.69516	0.75759
KIF11	0.23423	0.69636	0.75805
RFWD3	0.23377	0.69739	0.75834
DNA2	0.23239	0.70048	0.75976
HUS1	0.23237	0.70054	0.75976
C9orf69	0.23166	0.70221	0.75976
41528	0.2315	0.70257	0.75976
POGZ	0.22939	0.70739	0.76414
RUVBL1	0.22628	0.71465	0.77113
VCPIP1	0.2251	0.71744	0.7733
ZMYND11	0.22397	0.72009	0.7753
MSH3	0.22235	0.72382	0.7778
BLCAP	0.22228	0.724	0.7778
NASP	0.21826	0.73314	0.78677
DCLRE1B	0.21399	0.74296	0.79578
LSM10	0.21389	0.74316	0.79578
EHMT2	0.21214	0.74721	0.79924
H1FOO	0.21176	0.74812	0.79935
POLD1	0.21122	0.74938	0.79983
PPP5C	0.20999	0.75234	0.80212
RB1	0.2093	0.75397	0.80298
SPAG5	0.20612	0.76156	0.80931
FANCM	0.20412	0.76631	0.81348
NCOR1	0.20289	0.76911	0.81557
PSMB1	0.20183	0.77159	0.81674
ORC4	0.20171	0.77187	0.81674
DSCC1	0.19595	0.78557	0.83034
RBBP8	0.19228	0.79414	0.8385
EREG	0.1917	0.79556	0.83909
HMG20B	0.19027	0.79895	0.84093
PSMD8	0.18875	0.80253	0.84214
NEDD1	0.18866	0.80273	0.84214
CUL4B	0.18383	0.81437	0.85253
DIS3L2	0.18183	0.81917	0.85585
CLTC	0.18178	0.81928	0.85585
INHA	0.18101	0.82113	0.85686
FOXN3	0.17974	0.82424	0.8592
SIN3A	0.17658	0.83171	0.86607
CHMP1A	0.17563	0.83398	0.86662
SBDS	0.17562	0.834	0.86662
ANAPC15	0.17217	0.84244	0.87354
41520	0.16994	0.84781	0.87818
TGFB2	0.16913	0.84977	0.87929
LSM11	0.16333	0.86379	0.89004
ILF3	0.16192	0.86736	0.89186
E2F4	0.1606	0.87061	0.89426
STAG2	0.16019	0.87163	0.89438
RHNO1	0.15963	0.87307	0.89492
ARHGEF11	0.15912	0.87425	0.8952
PSMG2	0.15634	0.88109	0.90126
PSMD12	0.15094	0.89447	0.91253
RALA	0.15076	0.89489	0.91253
KIF13A	0.1477	0.9025	0.91933
USH1C	0.1465	0.90547	0.9214
CENPH	0.13793	0.92659	0.94095
KAT2B	0.13406	0.93646	0.94901
PSMD10	0.12624	0.95593	0.96744
NCAPH	0.12324	0.96361	0.97251
TRIAP1	0.12148	0.96804	0.97598
TBRG1	0.11763	0.9777	0.98276
MAP4	0.11761	0.97776	0.98276
DYNLT3	0.11651	0.9807	0.9847
VASH1	0.11582	0.98237	0.98538
ORC5	0.11519	0.98387	0.98588
SSSCA1	0.11349	0.98812	0.98912
TRIM71	0.11148	0.99328	0.99328
PSMD11	0.096161	0.96936	0.97631
CENPN	0.092523	0.96035	0.97022
RAD51	0.091059	0.95661	0.96744
LRRC6	0.080953	0.93175	0.94522
ITGB1	0.071688	0.90866	0.92369
KRT18	0.064183	0.8899	0.90932
ECT2	0.054335	0.86582	0.89121
MSH2	0.050758	0.85686	0.88384
TET2	0.050455	0.85614	0.88384
PML	0.050146	0.85541	0.88384
TXNL4A	0.044669	0.84209	0.87354
TUBGCP4	0.032618	0.8129	0.8519
HAUS1	0.027117	0.79987	0.84093
ERF	0.026865	0.79926	0.84093
POLE	0.0085978	0.75635	0.80465
ASZ1	-0.015138	0.70156	0.75976
RAD9A	-0.021126	0.6884	0.7521
SON	-0.043771	0.6384	0.71884
MDM2	-0.069571	0.58357	0.67836
UBE2C	-0.072821	0.57695	0.67437
BTG4	-0.082407	0.5572	0.65675
GAS2L3	-0.0859	0.55039	0.65343
DDB1	-0.086756	0.54868	0.65262
KLHL13	-0.089906	0.54242	0.649
SMC1B	-0.093621	0.53491	0.64507
PSRC1	-0.096621	0.52889	0.64264
PARD3	-0.10617	0.51006	0.6244
TUBG2	-0.10625	0.5099	0.6244
HBP1	-0.10705	0.50844	0.62396
CCNF	-0.10733	0.50792	0.62396
CCNA1	-0.11169	0.49975	0.62027
E2F7	-0.11459	0.49432	0.61736
ID4	-0.11848	0.48698	0.61136
TICRR	-0.12199	0.48054	0.60638
RGCC	-0.12339	0.47802	0.60553
NOX5	-0.12529	0.47453	0.60344
WAPAL	-0.12637	0.4725	0.60317
PDCD2L	-0.12816	0.46917	0.60052
RNF2	-0.12932	0.46701	0.60012
GPSM2	-0.13152	0.46303	0.59654
PSMA4	-0.13178	0.4625	0.59654
H2AFX	-0.13308	0.46022	0.59547
POC5	-0.13368	0.45919	0.59547
MLH3	-0.13693	0.45351	0.58968
KIF3B	-0.13916	0.44965	0.587
PSMA3	-0.14504	0.43907	0.57779
USP3	-0.14752	0.4347	0.57539
UBE2I	-0.14847	0.43299	0.5744
IST1	-0.1501	0.43008	0.57139
ZFP42	-0.1504	0.4295	0.57139
STMN1	-0.15062	0.42908	0.57139
MRE11A	-0.15646	0.41898	0.56938
BANP	-0.15911	0.41452	0.56559
ACTR8	-0.16332	0.40746	0.56255
LZTS1	-0.16432	0.40592	0.56245
TTC19	-0.16635	0.4025	0.55963
ESCO1	-0.16681	0.40164	0.55963
SAC3D1	-0.1672	0.40091	0.55963
ARL8A	-0.17548	0.38755	0.54973
CCNB1	-0.17743	0.38432	0.54973
EXO1	-0.18015	0.37996	0.54618
LIN54	-0.18106	0.3785	0.54618
MAD2L1BP	-0.18324	0.37502	0.54401
EIF4G2	-0.18382	0.3741	0.54401
SASS6	-0.18587	0.37077	0.5423
UPF1	-0.18652	0.36979	0.54174
BORA	-0.18837	0.36682	0.53899
PSME3	-0.1887	0.36627	0.53899
AK1	-0.18973	0.36454	0.53879
THBS1	-0.19399	0.35801	0.53241
CDC73	-0.19522	0.35614	0.53043
DDX4	-0.19588	0.35517	0.53019
DLGAP5	-0.19602	0.35494	0.53019
KIAA0430	-0.19606	0.35488	0.53019
POLE2	-0.19862	0.35095	0.53019
CUL1	-0.19948	0.34965	0.53019
SMC2	-0.19969	0.34937	0.53019
KATNB1	-0.20231	0.34544	0.52664
USP44	-0.20325	0.34409	0.52664
GORASP2	-0.20337	0.34391	0.52664
CEP78	-0.20601	0.33992	0.52653
FANCA	-0.20792	0.33708	0.52513
THAP1	-0.21023	0.33367	0.52147
TXNIP	-0.21085	0.33273	0.52082
PPP2R4	-0.21359	0.32891	0.51867
RPA3	-0.21499	0.32683	0.51735
CSRP2BP	-0.21533	0.32641	0.51735
PELO	-0.21782	0.32291	0.51363
CENPW	-0.21804	0.3226	0.51363
SYCE1L	-0.21842	0.32206	0.51363
INHBA	-0.21941	0.32066	0.51344
CENPK	-0.22354	0.31478	0.50893
CEP55	-0.22711	0.30984	0.50342
ZNF318	-0.22822	0.30829	0.50257
TSG101	-0.23003	0.30585	0.50025
CDCA2	-0.23017	0.30562	0.50025
RNF8	-0.23271	0.30199	0.4983
APITD1	-0.23344	0.30097	0.4983
NDEL1	-0.23631	0.29699	0.49565
ACTR1A	-0.23787	0.2949	0.49468
CUZD1	-0.23831	0.29436	0.49468
CCNT2	-0.23912	0.29326	0.49447
CCNO	-0.24411	0.28668	0.48588
REC8	-0.24454	0.28613	0.48577
RFC3	-0.2452	0.28524	0.4851
CENPP	-0.24538	0.28503	0.4851
AZI1	-0.24562	0.28469	0.4851
MTBP	-0.24749	0.2823	0.48345
VPS4A	-0.25199	0.27651	0.47602
RFC2	-0.25629	0.27117	0.46929
TRIP13	-0.25642	0.271	0.46929
CHTF8	-0.25816	0.26883	0.46929
OIP5	-0.25869	0.26813	0.46899
SESN2	-0.25921	0.26749	0.4687
MCMBP	-0.26115	0.26516	0.46544
TFDP3	-0.26355	0.26234	0.46296
EIF4EBP1	-0.26679	0.25823	0.45737
DCTN1	-0.26821	0.25649	0.4551
NUF2	-0.26922	0.25521	0.45366
TOP2A	-0.26968	0.25467	0.45358
XPO1	-0.2709	0.2533	0.45271
KLK10	-0.27341	0.25037	0.44911
PSMD13	-0.27516	0.24836	0.44632
MCM3	-0.27566	0.24774	0.44603
TUBB4B	-0.27619	0.24716	0.44579
ANKRD54	-0.27947	0.24338	0.4417
JTB	-0.27978	0.24303	0.4417
PPP1R9B	-0.28379	0.23837	0.43992
CCPG1	-0.28434	0.23777	0.43992
UBR2	-0.28716	0.23454	0.43665
NFATC1	-0.28777	0.2339	0.43665
USP16	-0.28889	0.23265	0.43665
INTS3	-0.28889	0.23266	0.43665
APBB1	-0.28913	0.23239	0.43665
FEN1	-0.28974	0.23176	0.43665
TXLNG	-0.29321	0.22778	0.43478
DAXX	-0.29398	0.22692	0.4343
DCTN2	-0.29513	0.22567	0.4343
CTNNB1	-0.29629	0.22445	0.4343
MLF1	-0.2974	0.22323	0.4343
CUL5	-0.29937	0.2211	0.4343
LZTS2	-0.30393	0.21618	0.43191
BRCC3	-0.30532	0.21468	0.43044
TP63	-0.30706	0.21293	0.42804
FANCG	-0.31115	0.20872	0.42579
CEP164	-0.31177	0.20809	0.42579
USP39	-0.3135	0.2063	0.42514
PIWIL4	-0.31436	0.20548	0.42514
SEPT9	-0.31662	0.20317	0.42222
TUBE1	-0.31764	0.2022	0.42199
CDC25B	-0.31787	0.20195	0.42199
MKI67	-0.31877	0.20102	0.42199
BARD1	-0.3192	0.20057	0.42199
41521	-0.31941	0.20036	0.42199
PPP1CA	-0.32244	0.19744	0.41919
M1AP	-0.32355	0.19641	0.4188
OPTN	-0.32449	0.19551	0.4187
PLD6	-0.32663	0.19346	0.41582
MAPRE3	-0.32836	0.19182	0.41442
ACTR3	-0.32955	0.19077	0.41396
CENPO	-0.33262	0.18796	0.41059
PAFAH1B1	-0.33672	0.18418	0.40412
JMY	-0.3372	0.18374	0.40412
AHCTF1	-0.33996	0.1812	0.40216
EIF4E	-0.3405	0.18072	0.40216
TXNL4B	-0.34284	0.17852	0.40157
SESN1	-0.3429	0.17846	0.40157
PSMA6	-0.34404	0.17739	0.40157
DNM2	-0.34445	0.17698	0.40157
IQGAP3	-0.34478	0.17665	0.40157
SUGT1	-0.34481	0.17662	0.40157
DYNLT1	-0.34577	0.17577	0.40157
HAUS4	-0.34607	0.17552	0.40157
DBF4	-0.34773	0.17412	0.40157
PSMC5	-0.35488	0.16792	0.39396
CASP2	-0.35697	0.16604	0.3914
CSNK2B	-0.35742	0.16561	0.3914
MPHOSPH9	-0.36122	0.1624	0.38798
PPP1CC	-0.36139	0.16224	0.38798
CCAR1	-0.36352	0.16051	0.38768
CCND3	-0.36666	0.15811	0.38307
BECN1	-0.36717	0.15765	0.38307
CRADD	-0.36855	0.15657	0.38286
PPM1G	-0.37035	0.15508	0.38017
TNKS	-0.37097	0.1546	0.37992
CYLD	-0.37187	0.15386	0.37906
HAUS3	-0.37211	0.15366	0.37906
CCNH	-0.37499	0.15148	0.37603
SUPT5H	-0.37955	0.1481	0.37139
CCNG1	-0.3817	0.14645	0.37008
ANKLE2	-0.38506	0.14379	0.36757
GORASP1	-0.38752	0.14205	0.36649
GINS2	-0.38788	0.14176	0.36649
SPIRE2	-0.389	0.14093	0.36554
EVI5	-0.38955	0.14047	0.36554
APPL2	-0.39106	0.13937	0.36534
PLK1S1	-0.39316	0.13786	0.36235
TMPRSS11A	-0.39531	0.1363	0.35945
SGOL1	-0.39611	0.13572	0.35945
PSMA7	-0.39611	0.13573	0.35945
BRIP1	-0.40008	0.13297	0.35424
FAM32A	-0.40081	0.13247	0.35385
POLD3	-0.40183	0.13177	0.35326
ZWINT	-0.40717	0.12793	0.34932
CEP41	-0.40758	0.12763	0.34932
PCNA	-0.40839	0.1271	0.34899
PSMA2	-0.40874	0.12685	0.34899
MAD2L2	-0.40875	0.12684	0.34899
SIAH2	-0.40983	0.12609	0.34899
MITD1	-0.41135	0.1251	0.34899
NTMT1	-0.41346	0.12366	0.34633
TUBGCP2	-0.41379	0.12344	0.34633
TP53INP1	-0.41385	0.12341	0.34633
IKZF1	-0.41443	0.12297	0.34633
PRR5	-0.4151	0.12257	0.34633
WNT10B	-0.41578	0.12215	0.34633
SETDB2	-0.41747	0.12106	0.34633
TUBB4A	-0.42188	0.1182	0.34073
PSMB2	-0.42436	0.11666	0.33929
CCNA2	-0.429	0.11377	0.33484
DPEP3	-0.42915	0.11366	0.33484
SUN2	-0.4302	0.11302	0.33484
PSMB4	-0.43168	0.11207	0.33484
SIAH1	-0.43233	0.11166	0.33484
DGKZ	-0.43416	0.11059	0.33484
MYB	-0.43521	0.10997	0.33484
PA2G4	-0.43609	0.10944	0.33484
INO80	-0.43814	0.10826	0.33484
THAP5	-0.43822	0.10822	0.33484
SPC24	-0.43997	0.10715	0.33484
PHGDH	-0.44133	0.10639	0.33484
41519	-0.44166	0.10616	0.33484
MNAT1	-0.44171	0.10613	0.33484
UBE2E1	-0.44565	0.10383	0.33484
PSMF1	-0.44841	0.10229	0.33407
RAD17	-0.45124	0.10074	0.33149
WASL	-0.45164	0.10048	0.33149
STAG3	-0.45364	0.099377	0.33149
UBE2D1	-0.45547	0.098334	0.33149
UBE2B	-0.45574	0.098177	0.33149
PHF8	-0.45615	0.097978	0.33149
PES1	-0.45857	0.096678	0.33149
MUC1	-0.46169	0.095017	0.33004
SESN3	-0.4628	0.094456	0.33004
PSMD5	-0.46408	0.09377	0.3292
DTL	-0.46561	0.092954	0.32907
PDPN	-0.46599	0.092783	0.32907
CDC25C	-0.46858	0.091502	0.32907
CENPM	-0.46876	0.091428	0.32907
FKBP6	-0.47661	0.087432	0.32018
CEP72	-0.47941	0.086	0.31662
STRA8	-0.48195	0.084739	0.31315
RRM2	-0.48333	0.084118	0.31203
HINFP	-0.48523	0.083215	0.31103
TEX40	-0.48716	0.082338	0.30892
PTPN11	-0.4941	0.079101	0.30255
NUP98	-0.49795	0.077416	0.29961
CCNT1	-0.49927	0.076836	0.29961
PSMC6	-0.5007	0.076248	0.29961
KIF20B	-0.50213	0.075622	0.29961
RASA1	-0.50628	0.073854	0.29632
ARL2	-0.50706	0.073561	0.29632
HIST1H3A	-0.50777	0.073235	0.29626
MLH1	-0.50866	0.072918	0.29619
KLLN	-0.5115	0.071674	0.29235
EGFL6	-0.5125	0.071261	0.29187
MIS18BP1	-0.51264	0.071204	0.29187
CCND2	-0.51476	0.070423	0.29087
SMC4	-0.51706	0.069479	0.28818
RRS1	-0.51802	0.069111	0.28786
ENSA	-0.51834	0.069005	0.28786
FBXO31	-0.51964	0.068503	0.28777
TFDP1	-0.51991	0.068395	0.28777
PRKAB2	-0.52083	0.068071	0.28777
DBF4B	-0.52084	0.068069	0.28777
NBN	-0.52133	0.067888	0.28777
ANLN	-0.52275	0.067302	0.28777
APBB2	-0.52378	0.066893	0.28777
ERCC6L	-0.52481	0.066496	0.28777
RPA2	-0.52641	0.065868	0.28777
XRCC2	-0.52731	0.065536	0.28777
CHAF1B	-0.53151	0.06398	0.2833
TOP3A	-0.53191	0.063825	0.2833
URGCP	-0.53407	0.063078	0.28185
RAB8A	-0.53767	0.061764	0.27724
PDCD6IP	-0.54279	0.060018	0.27188
CCP110	-0.54361	0.059762	0.27188
PTP4A1	-0.54635	0.058781	0.26886
ORC6	-0.54813	0.058161	0.26841
PINX1	-0.5546	0.056118	0.26021
UIMC1	-0.55612	0.055622	0.26021
E2F6	-0.56048	0.05422	0.25748
ODF2	-0.56321	0.053288	0.25428
LIN37	-0.56549	0.052551	0.25199
RALB	-0.56773	0.051866	0.25115
E4F1	-0.56921	0.051412	0.25019
NKX3-1	-0.56953	0.051331	0.25019
ANAPC1	-0.57083	0.05093	0.25019
NCAPG2	-0.57559	0.049632	0.24765
TUBB	-0.57882	0.048704	0.24552
PIWIL1	-0.58243	0.047693	0.24418
SUV39H2	-0.58271	0.04763	0.24418
CABLES2	-0.58342	0.047459	0.24418
CRYAA	-0.58394	0.04732	0.24418
KLHL42	-0.58485	0.047095	0.24418
41518	-0.58687	0.046515	0.24418
CUL4A	-0.59012	0.045642	0.24418
BABAM1	-0.5925	0.044952	0.24418
CIB1	-0.59385	0.044551	0.24418
ERCC4	-0.59642	0.043939	0.24265
EID1	-0.59752	0.043691	0.24264
PRKAG2	-0.59819	0.043534	0.24264
NIPBL	-0.59871	0.043406	0.24264
MAPRE2	-0.59964	0.043196	0.24264
RAB11FIP3	-0.60038	0.043015	0.24264
PSMC3	-0.60095	0.042869	0.24264
KLHDC3	-0.61107	0.040291	0.23436
RBM38	-0.61117	0.04026	0.23436
CDCA5	-0.61163	0.040132	0.23436
FBXO5	-0.61171	0.040112	0.23436
TUBB3	-0.61782	0.03871	0.23202
E2F5	-0.61928	0.038409	0.23163
MAP10	-0.62244	0.037711	0.23025
LMNA	-0.62367	0.037453	0.2301
ANAPC5	-0.62443	0.037255	0.2301
FANCD2	-0.62664	0.036796	0.22892
KIF25	-0.62723	0.036657	0.22892
RANGAP1	-0.62941	0.036197	0.22892
CASP8AP2	-0.62972	0.036142	0.22892
GPR132	-0.63196	0.035664	0.22892
GADD45GIP1	-0.63274	0.035487	0.22892
GTSE1	-0.63315	0.035418	0.22892
CCNB1IP1	-0.63497	0.034973	0.22892
PSMD1	-0.63733	0.03448	0.22892
SOX2	-0.6375	0.034429	0.22892
PSMA1	-0.63904	0.034146	0.22892
PLK5	-0.64051	0.033862	0.22892
CCND1	-0.64522	0.032885	0.22606
BOLL	-0.64885	0.032171	0.22428
GOLGA2	-0.65407	0.031194	0.2222
UHRF2	-0.65466	0.031095	0.2222
CHAMP1	-0.65688	0.030621	0.2222
RABGAP1	-0.66221	0.029597	0.21712
CDC25A	-0.66566	0.028977	0.21417
PCM1	-0.67174	0.027998	0.21009
DYNC1H1	-0.67324	0.027754	0.20986
FBXW7	-0.67449	0.027546	0.20986
GINS1	-0.68469	0.025906	0.20211
MARVELD1	-0.69213	0.024753	0.19623
RBBP4	-0.69265	0.024686	0.19623
NDE1	-0.69345	0.024562	0.19623
MCIDAS	-0.6993	0.023736	0.19443
CASC5	-0.70133	0.023396	0.19443
CEP135	-0.70484	0.022826	0.19343
ARL8B	-0.70512	0.022785	0.19343
XPC	-0.70528	0.022767	0.19343
PARD3B	-0.71278	0.021799	0.19014
NOLC1	-0.71348	0.021715	0.19014
TACC1	-0.71809	0.021119	0.19014
SPDL1	-0.71897	0.021011	0.19014
PARD6B	-0.71934	0.020962	0.19014
CCNE1	-0.7234	0.02046	0.19014
GAS2L2	-0.72398	0.020389	0.19014
ASUN	-0.73075	0.019546	0.19014
TERF1	-0.73268	0.019375	0.19014
CDK5RAP2	-0.7341	0.01919	0.19014
DSN1	-0.73529	0.019036	0.19014
PSMD7	-0.75061	0.017406	0.18011
MCM4	-0.75609	0.016806	0.17763
CCNY	-0.77254	0.015202	0.16604
NUP85	-0.77521	0.014948	0.1651
MYC	-0.77886	0.014604	0.16314
PPP1CB	-0.78757	0.013915	0.15722
HRAS	-0.78884	0.013805	0.15722
PARD6G	-0.7898	0.013721	0.15722
NUP160	-0.79115	0.013603	0.15722
PPP2R5C	-0.80034	0.012873	0.15432
RAD51C	-0.80043	0.012865	0.15432
TSC1	-0.80126	0.012806	0.15432
PSMB9	-0.81397	0.011837	0.14918
IRF6	-0.82265	0.01128	0.14589
HACE1	-0.82957	0.010775	0.14123
SKA2	-0.83028	0.010734	0.14123
BIRC6	-0.83059	0.010724	0.14123
RAD9B	-0.83662	0.010336	0.14111
GAS1	-0.83685	0.010323	0.14111
RASSF2	-0.84113	0.010059	0.14111
USP33	-0.84233	0.0099654	0.14111
DYNC1I2	-0.84836	0.0096378	0.13932
ZWILCH	-0.85015	0.0095381	0.13932
E2F3	-0.85322	0.0093489	0.13924
RAB11A	-0.85434	0.0093062	0.13924
CLSPN	-0.85894	0.00906	0.13916
CHAF1A	-0.86129	0.0089217	0.13916
CDKN2B	-0.86758	0.0086022	0.13639
PRDM9	-0.88096	0.0079207	0.12764
CETN2	-0.88548	0.0077131	0.12637
POLD4	-0.89435	0.0072757	0.12122
PSMA5	-0.89927	0.0070641	0.11972
APC	-0.906	0.0068016	0.1173
SPECC1L	-0.9088	0.0067101	0.1173
BNIP2	-0.90935	0.0066714	0.1173
SKP2	-0.91033	0.0066267	0.1173
TIPIN	-0.91526	0.0064354	0.1173
CHMP1B	-0.91676	0.0063784	0.1173
TEX11	-0.92724	0.0060061	0.1173
CCNE2	-0.94414	0.0054608	0.11621
CLASP1	-0.94568	0.0054201	0.11621
CDC5L	-0.94822	0.0053571	0.11621
RAD21	-0.95137	0.0052614	0.11621
FAM111A	-0.95185	0.0052472	0.11621
PRKAB1	-0.96442	0.0048728	0.11621
TP53BP2	-0.96546	0.004826	0.11621
ESPL1	-0.97217	0.0046165	0.11621
CABLES1	-0.97516	0.0045473	0.11621
EYA1	-0.99468	0.0040773	0.10832
RHOC	-0.99832	0.0039837	0.10832
PLAGL1	-1.0004	0.0039247	0.10832
ANK3	-1.002	0.0039003	0.10832
PRKAG3	-1.0072	0.0037701	0.10832
KCTD11	-1.012	0.0036887	0.10832
TUBA1A	-1.0186	0.0035768	0.10832
ASPM	-1.02	0.0035483	0.10832
ANAPC10	-1.0235	0.0034649	0.10832
ERBB2IP	-1.0239	0.0034568	0.10832
INCENP	-1.0358	0.0032187	0.10832
ROPN1B	-1.0474	0.0030031	0.10832
SDCCAG8	-1.057	0.0028444	0.10832
AHR	-1.0884	0.0024069	0.10287
CEP152	-1.1111	0.0021302	0.095182
HAUS8	-1.1216	0.0020163	0.095182
SMC1A	-1.1264	0.001943	0.095182
SKA3	-1.1299	0.0019084	0.095182
HAUS6	-1.1565	0.0016643	0.095182
CENPI	-1.2045	0.0012777	0.079625
SEH1L	-1.2096	0.0012309	0.079625
ANXA1	-1.2523	0.00099288	0.075077
SETD8	-1.253	0.00099084	0.075077
BRCA2	-1.4068	0.00044761	0.041455
TIPRL	-1.4528	0.00037436	0.040889
ING4	-1.5056	0.00031129	0.03825
SIRT2	-1.5602	0.00024008	0.033714
TACC3	-1.6053	0.00019939	0.032667
LIN9	-1.7891	8.9522e-05	0.0176
LIG4	-1.9347	5.4934e-05	0.0176
APPL1	-2.2247	3.0519e-05	0.015

## Sheet: Kinase library
Gene	Beta score	P-value	FDR
EIF2AK4	1.1596	3.94e-06	0.002
IKBKB	0.79892	0.00048521	0.056
PLK1	0.77633	0.00066272	0.056
AATK	0.64263	0.0035858	0.13814
STK17A	0.62668	0.0043195	0.14138
MUSK	0.61025	0.0053097	0.1512
ABL1	0.60014	0.0059645	0.1512
WNK1	0.57996	0.0076686	0.16546
CSNK1E	0.57672	0.0079921	0.16546
STYK1	0.57585	0.0080828	0.16546
AURKA	0.57398	0.0082485	0.16546
PNCK	0.57151	0.0084852	0.16546
CDK16	0.56037	0.0096844	0.17531
BRD3	0.55432	0.010481	0.17531
GRK5	0.55156	0.010856	0.17531
TRIM24	0.54998	0.011065	0.17531
SLK	0.52163	0.015775	0.21047
MAP3K12	0.51811	0.016438	0.21369
BUB1B	0.50294	0.019562	0.23553
MAST2	0.50137	0.019976	0.23553
STK24	0.49368	0.021815	0.24064
NTRK1	0.49156	0.022308	0.24064
CDK18	0.48096	0.025164	0.24229
DAPK3	0.47038	0.028446	0.24229
RYK	0.46729	0.029578	0.24229
STK39	0.46455	0.030497	0.24229
CSNK2A2	0.46146	0.031365	0.24229
MAPKAPK2	0.46118	0.031448	0.24229
TRIB2	0.45936	0.032142	0.24229
ALPK1	0.45903	0.032241	0.24229
MAK	0.45397	0.034032	0.24649
CIT	0.44477	0.037957	0.25619
STK38	0.44406	0.038264	0.25619
ERN2	0.43851	0.040702	0.25619
NEK9	0.43832	0.040805	0.25619
SRPK2	0.43581	0.041862	0.25619
STK16	0.42546	0.046931	0.27124
CDK15	0.41829	0.050607	0.27124
ANKK1	0.41686	0.051369	0.27124
GAK	0.41472	0.052469	0.27145
STK33	0.40536	0.057771	0.28183
MAPK6	0.39955	0.061215	0.28193
HIPK3	0.39618	0.063535	0.28193
CSNK1A1L	0.39043	0.067278	0.28253
TRRAP	0.39015	0.067428	0.28253
PLK4	0.38814	0.068915	0.28514
TTK	0.37887	0.075886	0.29361
TRIM28	0.37843	0.0763	0.29361
NUAK1	0.37779	0.076809	0.29361
TAF1L	0.37173	0.081609	0.30201
CASK	0.3699	0.083108	0.30533
CDK8	0.36226	0.089633	0.31477
GSG2	0.35699	0.094446	0.31972
PRKD2	0.35643	0.095014	0.31972
DYRK3	0.35621	0.095223	0.31972
TNIK	0.35354	0.097886	0.32387
PRKACB	0.35297	0.098375	0.32387
RPS6KC1	0.35217	0.099152	0.32432
PHKG2	0.34618	0.10529	0.33363
RET	0.34009	0.11187	0.34166
JAK1	0.33874	0.11344	0.34168
PRKCB	0.33403	0.11864	0.34947
CAMK1G	0.33357	0.11914	0.34947
MAP3K19	0.33344	0.11925	0.34947
CSNK2A1	0.33119	0.12194	0.35327
NPR2	0.32643	0.12779	0.35883
SGK196	0.32622	0.12804	0.35883
SPEG	0.32527	0.12931	0.35883
MAPK12	0.32489	0.12978	0.35883
MASTL	0.32245	0.13275	0.35883
SGK1	0.31886	0.13765	0.36161
ERBB3	0.31801	0.13884	0.36285
MAP2K3	0.31489	0.14308	0.36744
CHEK2	0.31317	0.1454	0.36744
CSNK1A1	0.31279	0.14592	0.36744
PIK3R4	0.31074	0.14874	0.36744
SRMS	0.3098	0.15014	0.36744
TP53RK	0.30945	0.15063	0.36744
FLT1	0.30884	0.1514	0.36744
IRAK4	0.3068	0.15406	0.36744
CLK4	0.30675	0.15415	0.36744
OXSR1	0.30667	0.15428	0.36744
LIMK1	0.3065	0.1545	0.36744
PDK1	0.30618	0.15493	0.36744
ACVR1C	0.30448	0.15748	0.36744
TGFBR2	0.30436	0.15765	0.36744
TRPM6	0.30196	0.16111	0.36744
RPS6KL1	0.30115	0.16227	0.36744
ALPK3	0.30039	0.16345	0.36744
PRKCA	0.30025	0.16366	0.36744
ADCK2	0.30016	0.16379	0.36744
MAPK11	0.29958	0.16461	0.36766
FLT3	0.29894	0.1657	0.36842
CDC7	0.29798	0.16725	0.36842
TRIO	0.29695	0.16899	0.36842
GRK1	0.29673	0.16931	0.36842
LIMK2	0.29581	0.17074	0.36858
GSK3B	0.29528	0.17157	0.36858
CDK13	0.29309	0.17497	0.36935
EPHA10	0.29305	0.17503	0.36935
SCYL1	0.2916	0.17739	0.37164
FGFR1	0.29057	0.17904	0.37291
PBK	0.28995	0.1801	0.37291
MELK	0.28674	0.18551	0.37291
PRKCQ	0.28665	0.18566	0.37291
ITK	0.28593	0.18693	0.37291
CSF1R	0.28549	0.18772	0.37291
MAP2K2	0.28518	0.18822	0.37291
ACVR1B	0.28493	0.18866	0.37291
EPHB3	0.28487	0.18876	0.37291
HIPK4	0.28288	0.192	0.37436
CHUK	0.2825	0.19272	0.37436
RIPK3	0.28165	0.19414	0.37455
DSTYK	0.28141	0.1946	0.37455
RNASEL	0.28114	0.19503	0.37455
NUAK2	0.27801	0.20041	0.37715
FYN	0.27789	0.20062	0.37715
SMG1	0.27738	0.20156	0.37715
PDPK1	0.27586	0.20424	0.37715
BLK	0.2756	0.20472	0.37715
TEC	0.27509	0.20564	0.37715
CDKL3	0.2727	0.20988	0.37937
ACVR1	0.27119	0.21274	0.38025
LRRK2	0.2711	0.21286	0.38025
PKN3	0.26942	0.21608	0.38161
EIF2AK3	0.26905	0.2168	0.38161
CDK7	0.26747	0.21984	0.38434
FASTK	0.26501	0.22445	0.38972
MAPKAPK5	0.26264	0.22904	0.39098
ILK	0.26144	0.23132	0.39162
ADCK4	0.26015	0.23382	0.39162
MARK1	0.26013	0.23385	0.39162
MAP3K5	0.26006	0.23404	0.39162
ERN1	0.25844	0.23739	0.39591
YES1	0.2581	0.23817	0.39591
PRKD3	0.25758	0.23919	0.39631
TSSK3	0.25677	0.24085	0.39646
STK17B	0.25598	0.24245	0.3972
ICK	0.25333	0.248	0.403
MYLK4	0.2528	0.24912	0.403
PKN1	0.25195	0.25073	0.403
BMX	0.25116	0.25252	0.403
MAST1	0.25103	0.2527	0.403
EPHB6	0.25057	0.25357	0.403
BRSK1	0.24782	0.25949	0.40784
TGFBR1	0.24767	0.25983	0.40784
TTBK2	0.24644	0.26247	0.40819
PTK6	0.24608	0.26325	0.40819
INSR	0.24607	0.26327	0.40819
CAMKV	0.24484	0.26594	0.40972
PRKCI	0.24465	0.26632	0.40972
TRIM33	0.24398	0.26779	0.41019
RIPK4	0.24298	0.27005	0.41112
MAP3K2	0.24149	0.27331	0.41112
FRK	0.23894	0.27917	0.41704
RPS6KA5	0.23532	0.28778	0.42414
MAP4K4	0.23214	0.29572	0.43083
SGK223	0.2309	0.29853	0.43108
LRRK1	0.23043	0.29969	0.43108
MAPK4	0.23014	0.30029	0.43108
MARK2	0.22983	0.30099	0.43108
DYRK1A	0.22904	0.30291	0.43131
NEK1	0.22862	0.30395	0.43131
STK31	0.22847	0.30425	0.43131
TBK1	0.22706	0.30753	0.43373
HCK	0.22634	0.30941	0.43455
TNK2	0.22523	0.31202	0.43559
PRKACG	0.22491	0.31288	0.43559
MAPK10	0.22436	0.31425	0.43559
WNK3	0.22346	0.31639	0.43559
MAP2K4	0.22336	0.31664	0.43559
TNK1	0.22221	0.31946	0.43657
FGFR4	0.22035	0.32402	0.44106
BMPR1A	0.21632	0.33391	0.44685
SGK494	0.2137	0.34064	0.45201
EGFR	0.21338	0.34146	0.45201
SIK2	0.21264	0.34331	0.45328
ALK	0.21162	0.34608	0.45473
SNRK	0.20938	0.35205	0.46121
AKT3	0.20833	0.35482	0.46364
TRIB1	0.20512	0.36332	0.47324
LMTK3	0.20486	0.36409	0.47324
BUB1	0.20242	0.37044	0.47836
PSKH1	0.20088	0.37479	0.47836
PXK	0.20014	0.37675	0.47836
CLK2	0.20005	0.37694	0.47836
STK19	0.19871	0.38075	0.48038
PAK1	0.19866	0.3809	0.48038
PRKCZ	0.19719	0.38496	0.48214
RAF1	0.19687	0.38582	0.48214
NEK7	0.19605	0.38813	0.48349
PRKAA2	0.19289	0.39739	0.49182
MAPKAPK3	0.19275	0.39776	0.49182
VRK2	0.19259	0.39824	0.49182
PIM1	0.1897	0.40626	0.49872
KSR2	0.18667	0.41529	0.50293
CDC42BPA	0.18653	0.41568	0.50293
MAP3K14	0.18617	0.4168	0.50293
PRKCG	0.18592	0.41762	0.50293
RPS6KA6	0.18485	0.42077	0.50432
STK10	0.18384	0.42375	0.50551
EPHA1	0.18279	0.42684	0.50668
MAST4	0.18262	0.42732	0.50668
CLK1	0.18074	0.43325	0.51202
SCYL2	0.18	0.43545	0.51343
LATS2	0.17876	0.43938	0.51686
PAK2	0.17773	0.44242	0.51791
PHKG1	0.17355	0.45516	0.52826
PRKCH	0.1733	0.45593	0.52826
TESK1	0.17318	0.45637	0.52826
MST4	0.17227	0.45938	0.53054
NEK10	0.17108	0.46322	0.53263
RPS6KB1	0.17105	0.4633	0.53263
EEF2K	0.17016	0.46621	0.53476
ARAF	0.16769	0.474	0.54247
MAP3K1	0.16703	0.47601	0.54329
RIOK1	0.16678	0.47685	0.54329
BRDT	0.1641	0.48572	0.55012
IRAK3	0.16397	0.4861	0.55012
STK35	0.15706	0.5088	0.57071
CSNK1D	0.15462	0.51681	0.57842
DYRK1B	0.15417	0.51826	0.57876
STRADA	0.15053	0.53063	0.59125
GRK4	0.15021	0.53178	0.59125
STK40	0.14959	0.53374	0.59214
ROCK2	0.14868	0.53685	0.59299
PAK4	0.14385	0.55368	0.60761
DMPK	0.14289	0.55702	0.60866
FLT4	0.14267	0.5578	0.60866
CDK10	0.14254	0.55824	0.60866
DCLK2	0.13913	0.57017	0.61965
TAOK3	0.13876	0.57141	0.61965
FGFR2	0.1363	0.58006	0.62595
PDK2	0.13623	0.58027	0.62595
WNK4	0.13048	0.601	0.64373
CDKL1	0.13024	0.60183	0.64373
DCLK1	0.12822	0.6092	0.64887
ROR1	0.12444	0.62333	0.65977
MAPK15	0.12344	0.62665	0.6619
MAP3K13	0.12273	0.62949	0.66351
CAMK1D	0.12109	0.63562	0.66859
CAMK2B	0.11873	0.64404	0.67604
NTRK3	0.1157	0.65479	0.68449
PAK7	0.11523	0.65662	0.68499
NEK8	0.11374	0.66224	0.68944
PINK1	0.10999	0.67602	0.70234
CDKL2	0.10814	0.6829	0.70803
PRKAA1	0.10647	0.68928	0.71319
STK38L	0.091751	0.74548	0.76821
TAOK1	0.091346	0.74721	0.76843
OBSCN	0.090403	0.75092	0.77068
MAP3K8	0.083372	0.77826	0.79392
MKNK2	0.078363	0.79791	0.81233
BCR	0.059798	0.87348	0.88748
IRAK1	0.056703	0.88588	0.89828
CSNK1G2	0.041271	0.94873	0.95249
MAST3	0.017643	0.95499	0.95499
CDK17	0.017358	0.95385	0.95499
CAMK4	0.013097	0.93653	0.9421
AURKB	0.0088437	0.91911	0.92642
MARK3	0.0086805	0.91839	0.92642
MAP2K5	0.0048431	0.90239	0.9132
ADRBK1	-0.028101	0.77051	0.7876
CAMK1	-0.032567	0.75299	0.77124
MAP3K10	-0.037652	0.73343	0.75733
EPHA2	-0.058657	0.65469	0.68449
RIOK2	-0.068333	0.61989	0.6575
MYLK	-0.069574	0.61559	0.6543
ADCK3	-0.07254	0.60503	0.64579
FGR	-0.076117	0.59275	0.63671
GRK7	-0.077838	0.58664	0.63148
PRKG2	-0.081995	0.57199	0.61965
TRIB3	-0.088117	0.55095	0.60592
CDK12	-0.091813	0.53863	0.59366
STK32C	-0.092562	0.5362	0.59299
PRKX	-0.1035	0.50073	0.5629
HSPB8	-0.10397	0.49927	0.56251
ABL2	-0.10626	0.49206	0.55562
EIF2AK1	-0.11055	0.47907	0.5446
PDK3	-0.12133	0.44665	0.52058
NLK	-0.12247	0.44334	0.51791
PLK2	-0.12277	0.44251	0.51791
EPHB2	-0.12775	0.42773	0.50668
PLK3	-0.12986	0.42183	0.50441
PKMYT1	-0.13066	0.41966	0.50418
NEK6	-0.1333	0.41219	0.50116
LTK	-0.13426	0.40922	0.49874
ROCK1	-0.13439	0.40882	0.49874
VRK1	-0.13448	0.40857	0.49874
STK25	-0.1377	0.39984	0.49204
DYRK4	-0.13813	0.39869	0.49182
FGFR3	-0.14269	0.38609	0.48214
PDGFRB	-0.14355	0.38379	0.48214
ACVR2A	-0.14592	0.3774	0.47836
MERTK	-0.14652	0.37582	0.47836
MAP3K7	-0.14664	0.3755	0.47836
MYLK2	-0.14678	0.37513	0.47836
STK32B	-0.14738	0.37354	0.47836
ACVRL1	-0.15052	0.36497	0.47324
MTOR	-0.15761	0.3462	0.45473
AMHR2	-0.16062	0.33851	0.45046
TESK2	-0.16205	0.33501	0.44697
SIK3	-0.16245	0.33404	0.44685
NRK	-0.16317	0.33247	0.44685
ZAP70	-0.16336	0.33199	0.44685
PAK3	-0.1644	0.32923	0.44511
MAPK7	-0.16606	0.32537	0.44107
STK36	-0.1664	0.32449	0.44106
MAP2K6	-0.1692	0.31789	0.43559
PIM2	-0.16955	0.31703	0.43559
ERBB2	-0.1701	0.31566	0.43559
BCKDK	-0.17072	0.3141	0.43559
CDC42BPG	-0.17327	0.30798	0.43373
DDR1	-0.17471	0.30456	0.43131
NRBP2	-0.17705	0.29897	0.43108
CDK11A	-0.17798	0.29678	0.43108
TTBK1	-0.17883	0.29481	0.43075
CDK19	-0.17969	0.29295	0.42927
CDK2	-0.18151	0.28877	0.42437
TSSK4	-0.18285	0.28578	0.42243
ATM	-0.1834	0.28457	0.42186
IGF1R	-0.18493	0.28103	0.41784
SRC	-0.18555	0.27967	0.41704
PEAK1	-0.18809	0.27408	0.41112
BRD4	-0.18841	0.27342	0.41112
RPS6KA1	-0.1885	0.27319	0.41112
JAK2	-0.18897	0.27217	0.41112
LMTK2	-0.19017	0.26959	0.41112
PKDCC	-0.19162	0.26668	0.40972
SRPK1	-0.19386	0.2619	0.40819
HIPK2	-0.19665	0.25629	0.4048
SYK	-0.19666	0.25628	0.4048
UHMK1	-0.19813	0.25334	0.403
CDKL4	-0.19839	0.2528	0.403
STK3	-0.20032	0.24867	0.403
AKT1	-0.20322	0.24286	0.3972
TSSK6	-0.20429	0.24079	0.39646
MAP3K15	-0.2082	0.23337	0.39162
ZAK	-0.20991	0.23013	0.39154
TNNI3K	-0.21064	0.22869	0.39098
FES	-0.21081	0.22836	0.39098
TBCK	-0.21112	0.22787	0.39098
STK32A	-0.21258	0.22527	0.3898
SCYL3	-0.21378	0.223	0.38853
DAPK2	-0.21664	0.21752	0.38161
RPS6KA4	-0.21832	0.21458	0.3804
CDK1	-0.21869	0.21392	0.3804
ULK3	-0.21917	0.213	0.38025
SBK1	-0.22067	0.21026	0.37937
MOK	-0.22173	0.2084	0.37871
INSRR	-0.22188	0.20813	0.37871
PASK	-0.22306	0.20606	0.37715
FER	-0.22389	0.20451	0.37715
BRAF	-0.22461	0.20334	0.37715
MAP2K7	-0.22551	0.20177	0.37715
KSR1	-0.22556	0.20171	0.37715
MAP4K2	-0.22716	0.19912	0.37715
PTK2B	-0.22743	0.19862	0.37715
EPHB4	-0.2321	0.19076	0.37342
ADRBK2	-0.23268	0.18976	0.37291
AAK1	-0.23287	0.18943	0.37291
MYO3A	-0.23476	0.18631	0.37291
PIM3	-0.23515	0.18568	0.37291
ULK2	-0.23715	0.18256	0.37291
SIK1	-0.23719	0.18252	0.37291
MYLK3	-0.23771	0.18167	0.37291
NRBP1	-0.24169	0.17557	0.36935
GUCY2C	-0.2422	0.17474	0.36935
MAP3K11	-0.24243	0.17437	0.36935
MYO3B	-0.24488	0.17087	0.36858
PRKACA	-0.24602	0.16914	0.36842
CDK5	-0.24756	0.16674	0.36842
EPHA6	-0.25103	0.16176	0.36744
CDKL5	-0.25154	0.16099	0.36744
JAK3	-0.25228	0.15997	0.36744
RPS6KB2	-0.25229	0.15994	0.36744
NEK11	-0.25237	0.15982	0.36744
NTRK2	-0.25304	0.15883	0.36744
CDK14	-0.25369	0.15795	0.36744
GSK3A	-0.25652	0.15397	0.36744
AURKC	-0.25691	0.15339	0.36744
CDK4	-0.2574	0.15271	0.36744
MET	-0.26203	0.14631	0.36744
MATK	-0.26426	0.1434	0.36744
EPHB1	-0.26606	0.14108	0.36682
DDR2	-0.26912	0.13734	0.36161
TLK1	-0.26935	0.13705	0.36161
ACVR2B	-0.27116	0.13486	0.35987
SRPK3	-0.27173	0.13416	0.35987
TIE1	-0.27259	0.13306	0.35883
MINK1	-0.27284	0.1328	0.35883
ULK1	-0.27413	0.13112	0.35883
MKNK1	-0.27466	0.13047	0.35883
CDK20	-0.27549	0.12938	0.35883
KIAA1804	-0.27559	0.12928	0.35883
DCLK3	-0.27793	0.12642	0.35883
CAMK2D	-0.27973	0.12429	0.35805
RIPK2	-0.28309	0.1206	0.35139
RPS6KA2	-0.28842	0.11457	0.34168
CDK9	-0.28862	0.11437	0.34168
EPHA3	-0.29016	0.11289	0.34168
PRPF4B	-0.29151	0.11153	0.34166
DYRK2	-0.29201	0.11105	0.34166
MARK4	-0.29385	0.10916	0.33955
NEK2	-0.29454	0.10846	0.33943
CAMK2G	-0.29502	0.10789	0.33943
LATS1	-0.30002	0.10265	0.32731
PDIK1L	-0.30092	0.10178	0.32658
RPS6KA3	-0.30153	0.10125	0.32658
TEX14	-0.30252	0.10038	0.32624
IKBKE	-0.30731	0.095862	0.31975
TAF1	-0.30964	0.093862	0.31972
CSNK1G3	-0.31152	0.092276	0.31826
CDK6	-0.31315	0.090679	0.31489
MAPK13	-0.31387	0.090024	0.31477
EPHA4	-0.3139	0.089992	0.31477
MAP4K3	-0.31478	0.089199	0.31477
C9orf96	-0.31671	0.087582	0.31477
MLKL	-0.31998	0.084769	0.30699
GRK6	-0.32081	0.084087	0.30671
CSK	-0.32537	0.080509	0.30013
MAP4K5	-0.32763	0.078623	0.29527
MAP3K9	-0.32888	0.077602	0.29361
CAMKK2	-0.32895	0.077538	0.29361
ALPK2	-0.32899	0.077499	0.29361
AXL	-0.33027	0.076454	0.29361
NEK5	-0.33105	0.075866	0.29361
GUCY2D	-0.33608	0.072071	0.29
CSNK1G1	-0.33853	0.0703	0.28514
PTK7	-0.33867	0.070209	0.28514
MAPK14	-0.3399	0.06929	0.28514
LCK	-0.34334	0.066828	0.28253
PDGFRA	-0.34516	0.065617	0.28193
CDC42BPB	-0.3455	0.065424	0.28193
PTK2	-0.34587	0.065172	0.28193
ERBB4	-0.34646	0.06484	0.28193
PRKCD	-0.34674	0.064635	0.28193
ULK4	-0.34827	0.063594	0.28193
KIT	-0.34833	0.06355	0.28193
HUNK	-0.34877	0.063318	0.28193
MAP2K1	-0.34901	0.063136	0.28193
MAP4K1	-0.34913	0.063069	0.28193
PRKG1	-0.35079	0.061968	0.28193
WNK2	-0.3539	0.060032	0.28193
BMPR2	-0.35727	0.057811	0.28183
STK4	-0.36024	0.056138	0.27904
MAP3K3	-0.36075	0.055791	0.27904
MAPK8	-0.36465	0.053562	0.27156
TYRO3	-0.36473	0.053519	0.27156
MOS	-0.36777	0.051893	0.27124
KDR	-0.3685	0.051487	0.27124
PKN2	-0.36899	0.051239	0.27124
DAPK1	-0.37041	0.050402	0.27124
EPHA8	-0.37214	0.049535	0.27124
MAPK1	-0.37236	0.04944	0.27124
NEK4	-0.37243	0.049396	0.27124
SBK2	-0.37252	0.049365	0.27124
BMP2K	-0.38184	0.044351	0.26147
SGK2	-0.38207	0.044245	0.26147
TYK2	-0.38414	0.043239	0.26098
LYN	-0.38689	0.041941	0.25619
TEK	-0.38857	0.041227	0.25619
ROS1	-0.39152	0.039893	0.25619
AKT2	-0.3923	0.039523	0.25619
PAK6	-0.39381	0.03886	0.25619
ADCK5	-0.39476	0.03845	0.25619
MST1R	-0.40024	0.036355	0.256
BRD2	-0.40025	0.036347	0.256
TAOK2	-0.40927	0.032974	0.24229
TLK2	-0.40989	0.032742	0.24229
CAMKK1	-0.41757	0.02989	0.24229
HIPK1	-0.41862	0.029495	0.24229
STK11	-0.42154	0.028667	0.24229
ROR2	-0.42191	0.028533	0.24229
PRKCE	-0.42341	0.028047	0.24229
EPHA7	-0.42419	0.027815	0.24229
MAP3K6	-0.42587	0.027321	0.24229
KALRN	-0.42626	0.027191	0.24229
NPR1	-0.4265	0.027112	0.24229
CHEK1	-0.43479	0.024564	0.24229
WEE1	-0.43942	0.023325	0.24135
BRSK2	-0.44119	0.022848	0.24133
RIPK1	-0.4436	0.022197	0.24064
PRKDC	-0.44872	0.020892	0.24064
CDK3	-0.4529	0.019838	0.23553
MAP3K4	-0.46246	0.017724	0.22465
PRKD1	-0.47905	0.014623	0.20038
SGK3	-0.47956	0.014544	0.20038
TXK	-0.48802	0.01316	0.19063
EIF2AK2	-0.49212	0.012552	0.18718
IRAK2	-0.49465	0.01217	0.18697
ATR	-0.50925	0.010158	0.17531
MAPK3	-0.51496	0.0094911	0.17531
NEK3	-0.53607	0.0073412	0.16546
VRK3	-0.5542	0.0057199	0.1512
RIOK3	-0.55776	0.0054596	0.1512
BTK	-0.57382	0.0044615	0.14138
EPHA5	-0.58783	0.0038146	0.13814
TRPM7	-0.59948	0.0033176	0.13814
MAPK9	-0.59992	0.0032978	0.13814
CLK3	-0.61645	0.0026193	0.1328
BMPR1B	-0.62537	0.0023314	0.13133
CAMK2A	-0.62673	0.0022761	0.13133
TTN	-0.64526	0.0018738	0.13133
STRADB	-0.72314	0.00065089	0.056
PDK4	-0.89469	9.07e-05	0.015333
ADCK1	-1.0183	2.37e-05	0.006
